# Supplementary material for: Burnout Syndrome in Spanish Medical Students
Source: Research Square preprint supplement (doi:10.21203/rs.3.rs-130533/v1), 2020-12-28
Supplement: Supplementary file 1 [file feca6a8f3e7c8c842671e5cd.docx]

**Tittle:** Burnout syndrome in Spanish medical students

**Authors:** Javier Gil-Calderón1*, Jéssica Alonso-Molero2,3*, Trinidad Dierssen-Sotos2,3, Inés Gómez-Acebo2,3, Javier Llorca2,3

***SUPPLEMENTARY TABLE 1:*** *Personal questions of the survey*

| **QUESTIONS RELATED TO PERSONAL INFORMATION** |
| --- |
| 1. In which University are you studying? |
| 2. What year of the Medicine degree are you studying? |
| 3. How many years have you been studying the Medicine degree? |
| 4. How old are you? |
| 5. Did you start studying Medicine because of your vocation? |
| 6. Do you feel familiar support to study Medicine? |
| 7. What is your gender? |

***SUPPLEMENTARY TABLE 2:*** *Burnout questionnaire subscales and questions*

| **QUESTIONS RELATED TO BURNOUT SYMPTOMS** | |
| --- | --- |
| EMOTIONAL EXHAUSTION | I feel emotionally drained by my studies. |
| I feel used up at the end of the day at University. |
| I feel tired when I get up in the morning and I have to face another day at the University. |
| Studying or attending a class is really a strain for me. |
| I feel burned out form my studies. |
| DEPERSONALIZATION | I have become less interested in my studies since my enrollment at the University. |
| I have become less enthusiastic about my studies. |
| I have become more cynical about the potential usefulness of my studies. |
| I doubt the significance of my studies. |
| ACADEMIC EFFICACY | I can effectively solve the problems that arise in my studies. |
| I believe that I make an effective contribution to the classes that I attend. |
| In my opinion, I am a good student. |
| I feel stimulated when I achieve my study goals. |
| I have learned many interesting things during the course of my studies. |
| During the class I feel confident that I am effective in getting things done. |

Supplementary Table 3. Thresholds for burnout levels in each score

|  | Score |  |  |
| --- | --- | --- | --- |
| Burnout level | Exhaustion | Depersonalization | Academic efficacy |
| Very low | 5 – 10 | 4 – 8 | 6 – 12 |
| Low | 10.1 – 15 | 8.1 – 12 | 12.1 – 18 |
| Medium | 15.1 – 25 | 12.1 – 20 | 18.1 – 30 |
| High | 25.1 – 30 | 20.1 – 24 | 30.1 – 36 |
| Very high | 30.1 - 40 | 24.1 - 32 | 36.1 - 48 |

***SUPPLEMENTARY TABLE 4:*** *Sample description*

| MEDICAL STUDENTS *(1073)* | | | |
| --- | --- | --- | --- |
|  |  | ***n*** | ***%*** |
| GENDER | Male | 266 | 24.79% |
| Female | 804 | 74.93% |
| Others | 3 | 0.28% |
| AGE | 18 | 114 | 10.62% |
| 19 | 99 | 9.23% |
| 20 | 163 | 15.19% |
| 21 | 186 | 17.33% |
| 22 | 197 | 18.36% |
| 23 | 166 | 15.47% |
| 24 | 68 | 6.34% |
| 25 | 27 | 2.52% |
| 26 | 17 | 1.58% |
| 27 | 9 | 0.84% |
| 28 | 3 | 0.28% |
| 29 | 4 | 0.37% |
| 30 | 6 | 0.56% |
| >30 | 14 | 1.30% |
| YEAR | 1 | 167 | 15.56% |
| 2 | 123 | 11.46% |
| 3 | 225 | 20.97% |
| 4 | 200 | 18.64% |
| 5 | 254 | 23.67% |
| 6 | 104 | 9.69% |

| MEDICAL STUDENTS *(1073)* | | | |
| --- | --- | --- | --- |
|  |  | ***n*** | ***%*** |
| YEARS STUDYING MEDICINE | 1 | 185 | 17.24% |
| 2 | 115 | 10.72% |
| 3 | 211 | 19.66% |
| 4 | 192 | 17.89% |
| 5 | 230 | 21.44% |
| 6 | 99 | 9.23% |
| 7 | 23 | 2.14% |
| 8 | 9 | 0.84% |
| 9 | 2 | 0.19% |
| >10 | 7 | 0.65% |
| VOCATION | Yes | 943 | 87.88% |
| No | 130 | 12.12% |
| FAMILY SUPPORT | High >7 | 914 | 85.18% |
| Medium | 132 | 12.30% |
| Low <3 | 27 | 2.52% |
| GEOGRAPHIC UBICATION *(considering North over Extremadura, Madrid and CLM)* | Madrid | 227 | 21.16% |
| Cataluña | 116 | 10.81% |
| Islands | 8 | 0.75% |
| North | 497 | 46.32% |
| South | 225 | 20.97% |

| UNIVERSITY | University | n | % |
| --- | --- | --- | --- |
| University of Alcalá | 173 | 16,12% |
| Alfonso X el Sabio University | 1 | 0,09% |
| Autonomous University of Barcelona | 12 | 1,12% |
| Autonomous University of Madrid | 18 | 1,68% |
| University of Barcelona | 86 | 8,01% |
| University of Cádiz | 15 | 1,40% |
| University of Cantabria | 197 | 18,36% |
| Carlos the Tirth University of Madrid | 0 | 0,00% |
| University of Castilla la Mancha - Albacete | 8 | 0,75% |
| University of Castilla la Mancha – Ciudad Real | 2 | 0,19% |
| Catholic University of Valencia | 0 | 0,00% |
| CEU Cardenal Herrera | 19 | 1,77% |
| CEU San Pablo | 0 | 0,00% |
| Complutense University of Madrid | 7 | 0,65% |
| University of Córdoba | 19 | 1,77% |
| European University of Madrid | 8 | 0,75% |
| University of Extremadura | 24 | 2,24% |
| Francisco of Vitoria University | 14 | 1,30% |
| University of Girona | 1 | 0,09% |
| University of Granada | 72 | 6,71% |
| International University of Cataluña | 0 | 0,00% |
| University of Balear Islands | 2 | 0,19% |
| Jaime the First University | 0 | 0,00% |
| University of La Laguna | 6 | 0,56% |
| University of Palma de Gran Canaria | 0 | 0,00% |
| University of Lleida | 0 | 0,00% |
| University of Málaga | 38 | 3,54% |
| Miguel Hernández University | 0 | 0,00% |
| University of Murcia | 3 | 0,28% |
| University of Navarra | 154 | 14,35% |
| University of Oviedo | 40 | 3,73% |
| University of the Vasque Country | 24 | 2,24% |
| Pompeu i Fabra University | 0 | 0,00% |
| Rey Juan Carlos University | 6 | 0,56% |
| Rovira i Virgili University | 17 | 1,58% |
| University of Salamanca | 30 | 2,80% |
| University of Santiago de Compostela | 24 | 2,24% |
| University of Sevilla | 13 | 1,21% |
| University of Valencia | 12 | 1,12% |
| University of Valladolid | 1 | 0,09% |
| University of Vic | 0 | 0,00% |
| University of Zaragoza | 27 | 2,52% |

***SUPPLEMENTARY TABLE 5:*** *Pearson´s correlation coefficient between the burnout scales.*

|  | Exhaustion | Depersonalization | Academic Efficacy |
| --- | --- | --- | --- |
| Exhaustion | 1.0000 |  |  |
| Depersonalization | 0.5343 | 1.0000 |  |
| Academic efficacy | 0.3640 | 0.4688 | 1.0000 |
